# Supplementary material for: New diagnostic technique to evaluate hepatic steatosis using the attenuation coefficient on ultrasound B mode
Source: PLoS One. 2019 Aug 27;14(8):e0221548. doi: 10.1371/journal.pone.0221548 (PMC6711590; doi:10.1371/journal.pone.0221548)
Supplement: S2 Dataset — (XLSX) [file pone.0221548.s003.xlsx]

## Sheet: detaset2
CAP measurement time (sec.)	ATT measurement time (sec.)	subcutaneous fat thickness
110	50	10
114	27	10
163	34	11
141	33	11
116	33	11
166	51	12
343	32	12
562	29	12
143	45	12
112	35	12
134	33	12
121	95	12
106	28	12
112	58	12
129	47	12
150	47	13
398	75	13
144	36	13
120	33	13
112	43	13
489	35	13
129	31	13
140	45	13
159	45	13
173	33	15
174	36	15
227	42	15
117	35	15
106	38	15
204	39	15
147	39	15
162	34	15
179	47	16
131	29	16
159	65	17
223	39	18
109	33	18
113	37	18
262	55	18
163	41	18
217	52	18
140	37	18
127	55	18
151	48	18
112	31	18
113	33	18
135	37	18
141	28	18
205	35	18
126	35	18
327	40	18
117	58	19
106	30	19
142	32	19
141	47	19
129	32	19
162	31	19
253	34	19
119	40	19
278	48	20
208	50	20
233	53	20
149	29	20
114	45	20
117	37	20
113	43	20
133	37	20
139	37	20
123	36	20
130	39	20
187	39	20
118	35	20
120	33	20
759	45	21
563	57	21
354	45	21
235	30	21
117	28	22
171	35	22
242	43	22
273	33	22
232	28	22
375	47	22
110	28	22
172	46	23
186	35	23
117	31	23
230	43	25
144	60	27
188	52	28
789	42	28
341	34	30
343	45	33
334	51	33
